# Supplementary material
Source: publisher site journal article supplement (https://www.dovepress.com/article/332474)
Supplement: Supplementary file 1 [file get_supplementary_file.php]

**Appendix**

**Appendix 1 Incidence of adverse events associated with each intervention**

| Adverse events | Involved RCTs | Incidence in different interventions | | | | |
| --- | --- | --- | --- | --- | --- | --- |
| acupuncture | placebo-acupuncture | HRT | hypnotics or antidepressants | HRT + antidepressants |
| hematoma | [56,61,65,67,68,69,97] | 25/324 (7.72%) | 0 | - | - | - |
| sweating | [56,86] | 5/74 (6.76%) | - | - | 10/76 (13.16%) | 0 |
| mild pain or bleeding | [54,87,88] | 6/196 (3.06%) | 1/42 (2.38%) | - | - | - |
| nausea and/or vomiting | [58,60,70,72,73,74,75,86,87] | 8/365 (2.19%) | - | - | 11/226 (4.87) | 10/140 (7.14%) |
| dizziness | [56,58,59,61,65,67,68,69,70,72,73,74,75,86,87,88,97] | 12/759 (1.58%) | 0 | - | 64/508 (12.60%) | 9/200 (4.5%) |
| palpitation | [56,69,71,74,75,79] | 4/270 (1.48%) | 0 | - | 25/256 (9.77%) | - |
| gastro-intestinal symptoms (e.g., stomachache, loss of appetite, indigestion, diarrhea, constipation, changes of character of stool, etc.) | [56,69,71,72,79,86,88] | 4/332 (1.20%) | 0 | - | 34/217 (17.35%) | 14/106 (15.67%) |
| dry mouth and halitosis | [56,61,71,72,74,75,79,86] | 1/264 (0.38%) | 0 | - | 38/216 (17.59%) | 5/46 (10.87%) |
| breast tenderness | [71,79,86,88,97] | 0 | - | 2/36 (5.56%) | 11/50 (22%) | 5/106 (4.72%) |
| headache | [56,72,97] | 0 | - | 1/36 (2.78%) | 3/62 (4.84%) | - |
| colporrhagia | [97] | 0 | - | 1/36 (2.78%) | 0 | - |
| leukorrhagia | [88] | 0 | - | - | - | 2/60 (3.33%) |
| daytime sleepiness and/or fatigue | [56,59,65,67,68] | 0 | - | - | 52/177 (29.38%) | - |
| sleep disturbance (e.g., worsening of insomnia, dreaminess, hypersomnia, etc.) | [56,71,75,79,86,87] | 0 | 4/37 (10.81%) | - | 20/110 (18.18%) | 5/140 (3.57%) |
| neuropsychiatric symptoms (e.g., dysphoria, akathisia, forexcitation and agitation, memory loss, spasmus, etc.) | [67,71,75,79,86,88] | 0 | - | - | 15/110 (13.64%) | 3/106 (2.83%) |
| skin symptom such as skin rashes | [58,75] | 0 | - | - | 2/60 (3.33%) | - |

***Notes:*** “-” for where the adverse events were not measured
